# Supplementary material for: Novel integrative rehabilitation system for the upper extremity: Design and usability evaluation
Source: PubMed Central journal article supplement — J Rehabil Assist Technol Eng. 2021 Jul 7;8:20556683211012885. doi: 10.1177/20556683211012885 (PMC8373277; doi:10.1177/20556683211012885), 2021-07-07
Supplement: sj-pdf-1-jrt-10.1177_20556683211012885.pdf [file sj-pdf-1-jrt-10.1177_20556683211012885.pdf]

To view the full contents of this document, you need a later version of the PDF viewer. You can upgrade to the latest version of Adobe Reader from [www.adobe.com/products/acrobat/readstep2.html](http://www.adobe.com/products/acrobat/readstep2.html)

For further support, go to [www.adobe.com/support/products/acrreader.html](http://www.adobe.com/support/products/acrreader.html)
